# Supplementary material for: Ordered porous Ni in situ decorated by thin-layer amorphous nickel–phosphorus via mild electrochemical-phosphorization for enhancing the hydrogen evolution performance
Source: Royal Society of Chemistry journal article supplement (doi:10.1039/c9cc08698f), 2019-12-05
Supplement: c9cc08698f1.pdf [file c9cc08698f1.pdf]

## Supplementary Information

**Ordered porous Ni *in-situ* decorated by a thin-layer amorphous nickel-phosphorus via mild electrochemical-phosphorization for enhancing the hydrogen evolution performance**

Kun Xiong\*, Yuan Gao, Jia Chen, Yu Shen, Haidong Zhang\*

*Engineering Research Center for Waste Oil Recovery Technology and Equipment of Ministry of Education, National Research Base of Intelligent Manufacturing Service, Chongqing Technology and Business University, Chongqing 400067, China*

\*Corresponding author:

E-mail addresses: kunxiong@ctbu.edu.cn; haidongzhang@ctbu.edu.cn

## 1. Experimental section

**Preparation of p-Ni and Ni-P/p-Ni:** The porous Ni, named as p-Ni, was constructed by electrodepositing a porous Ni network on a clean Ni substrate (50.0 mm×10.0 mm×0.25 mm) using a facile hydrogen bubble dynamic template route. It was performed according to our previous method (RSC Adv., 2014, 4, 20521) in an electrolyte of 2.0 mol L<sup>-1</sup> NH<sub>4</sub>Cl and 0.1 mol L<sup>-1</sup> NiCl<sub>2</sub> with a Ni foil as a counter electrode at a cathode current density of 2.0 A cm<sup>-2</sup> for 100 s. Afterwards, the p-Ni acted as a working electrode in a three-electrode system and was electrochemical-phosphorization at -1.2 V versus Ag/AgCl for 2 h in an electrolyte containing NaH<sub>2</sub>PO<sub>2</sub> to generate amorphous Ni-P on the surface of p-Ni.

**Preparation of Ni<sub>2</sub>P/p-Ni:** The p-Ni and NaH<sub>2</sub>PO<sub>2</sub> were placed in alumina boats and heated at 300 °C for 2 h in an Ar atmosphere to obtain traditional Ni<sub>2</sub>P/p-Ni.

## 2. Characterizations and electrochemical measurements

The surface morphology and property of the catalysts were analyzed by X-ray diffraction (XRD-6000, Shimadzu), field-emission scanning electron microscopy (SEM, JSM-7800, Japan), and X-ray photoelectron spectroscopy (XPS, PE PHI-5400), respectively. Electrochemical measurements were conducted in a three-electrode system with an Electrochemical Workstation (Autolab electrochemical analyzer, PGSTAT302 N, Metrohm) and a CHI-660E electrochemical analyzer (CHI, Shanghai, China).

The electrode area of the working electrode is 1 cm<sup>2</sup>. A graphite sheet in parallel orientation to the working electrode was used as the counter electrode and a mercuric oxide electrode (Hg/HgO) as the reference electrode. The catalytic performance of the prepared electrodes toward HER was systematically investigated in a 1.0 mol L<sup>-1</sup> KOH electrolyte. All potentials mentioned in this work were converted to the values with reference to a reversible hydrogen electrode (RHE). Double layer capacitance of the electrodes was tested by cyclic voltammetry at scan rate from 5 to 100 mV s<sup>-1</sup>. And the electrochemical active surface areas

(ECSAs) of the catalysts were determined by the equation:  $ECSA = R_f \times S$ , where  $S$  was  $1 \text{ cm}^2$  and the  $R_f$  was determined by  $R_f = C_{dl} / 60 \text{ } \mu\text{F cm}^{-2}$  based on the double-layer capacitance ( $C_{dl}$ ) of a smooth oxide surface ( $60 \text{ } \mu\text{F cm}^{-2}$ ).

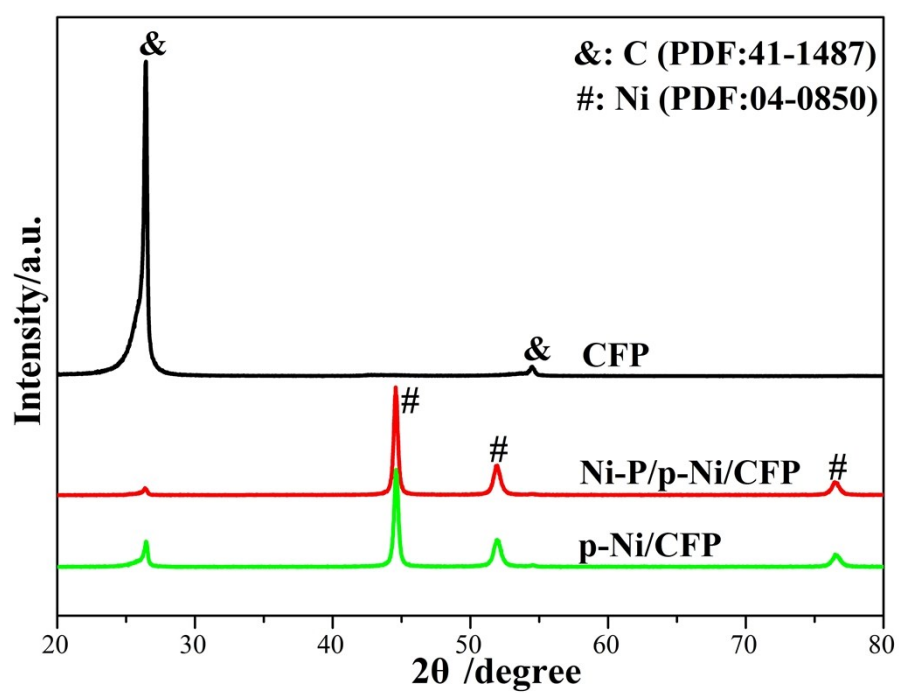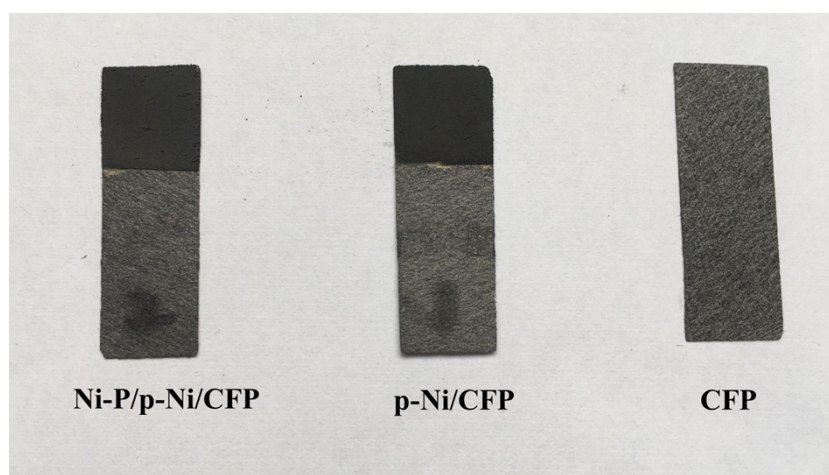

**Fig. S1** XRD patterns and photograph of the CFP, p-Ni/CFP and Ni-P/p-Ni/CFP.

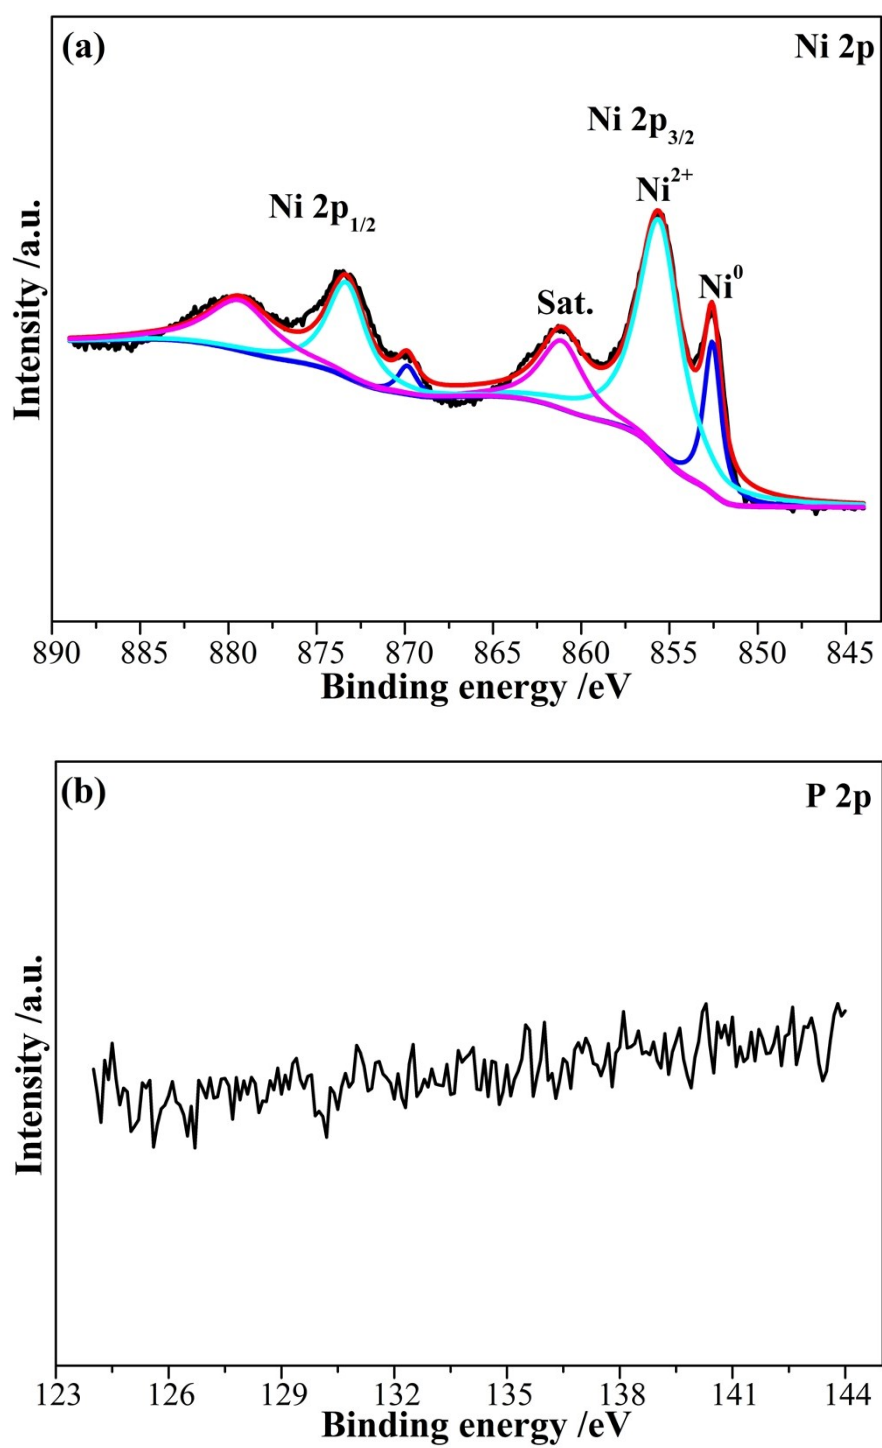

**Fig. S2** High-resolution Ni 2p and P 2p XPS spectra of the p-Ni.

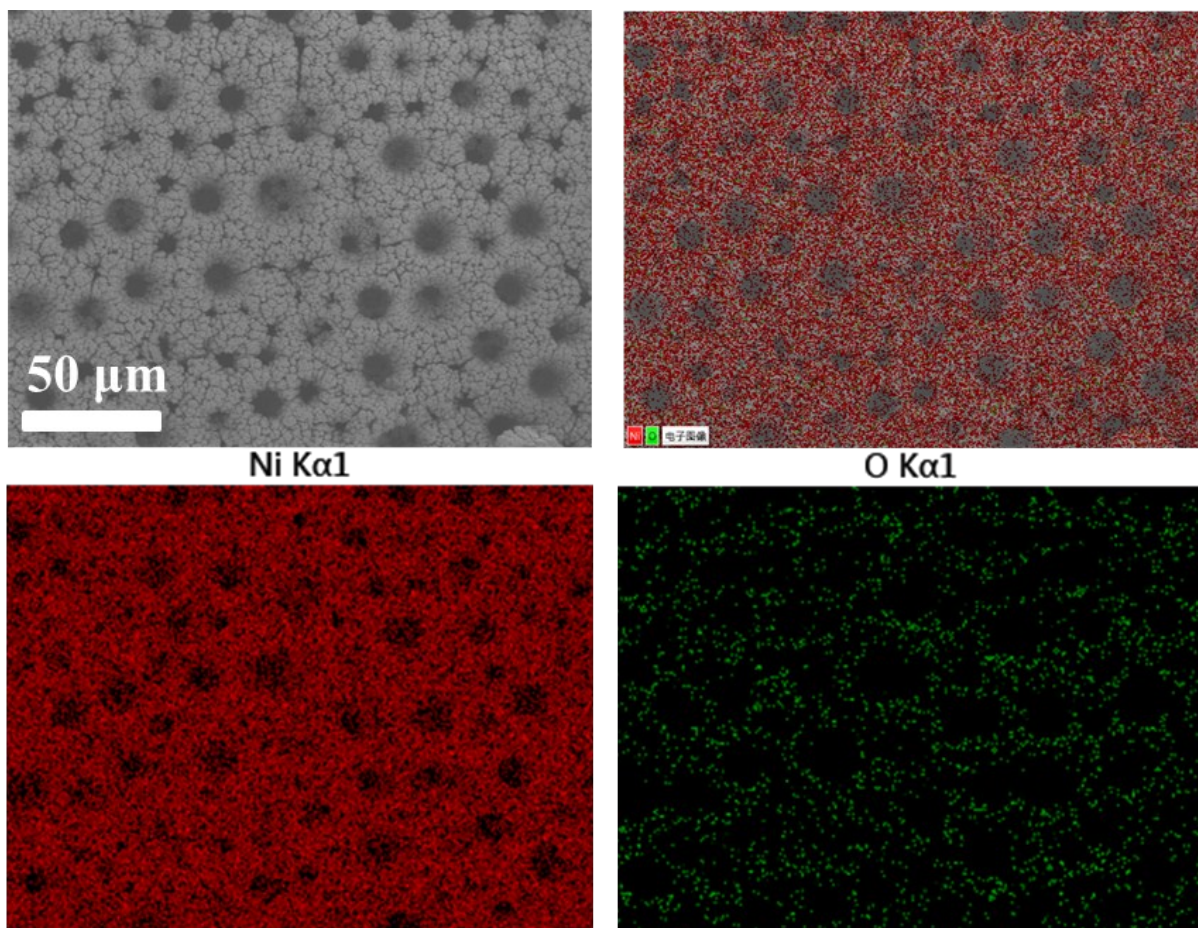

**Fig. S3** SEM image and the corresponding elemental mapping images of Ni and O in the p-Ni.

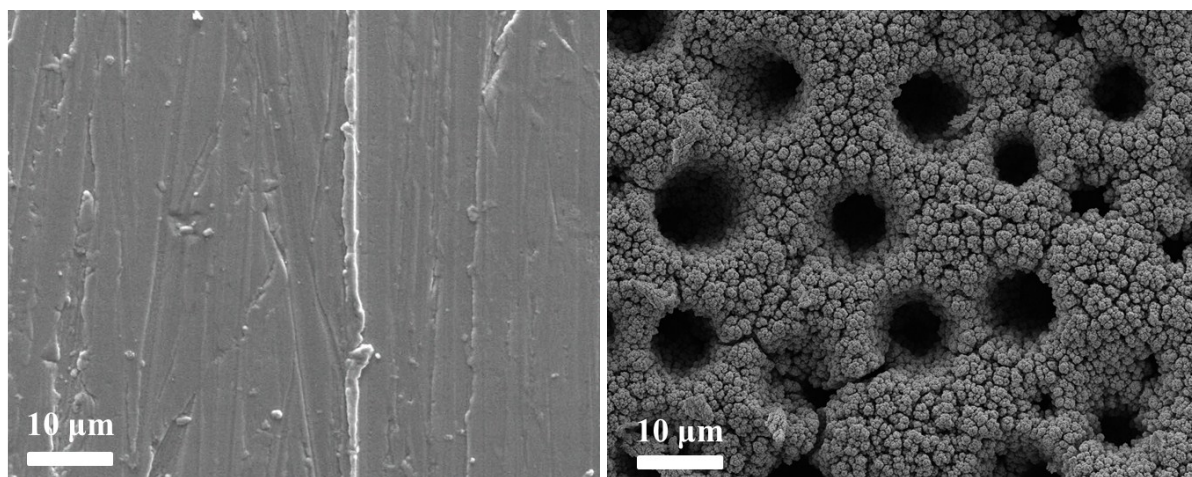

**Fig. S4** SEM images of Ni substrate and the  $\text{Ni}_2\text{P}/\text{p-Ni}$  prepared by traditional solid-phosphorization process.



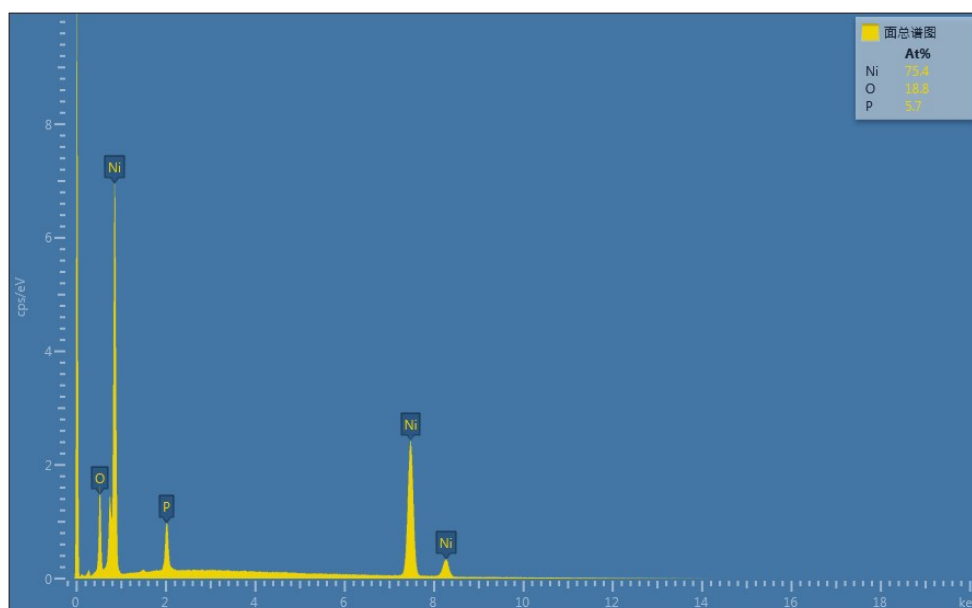

**Fig. S5** EDX spectrum of the Ni-P/p-Ni

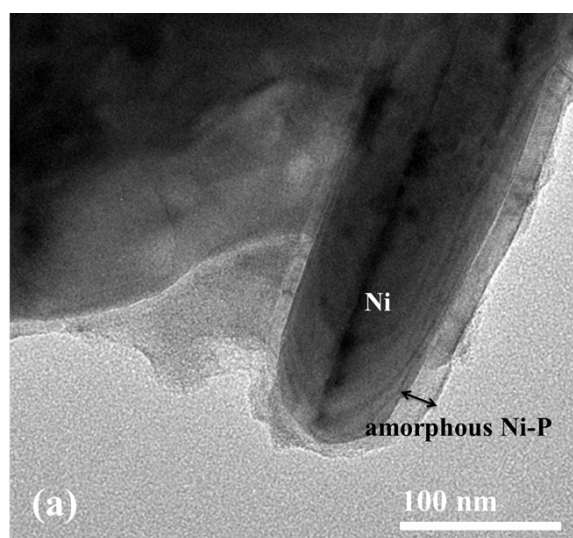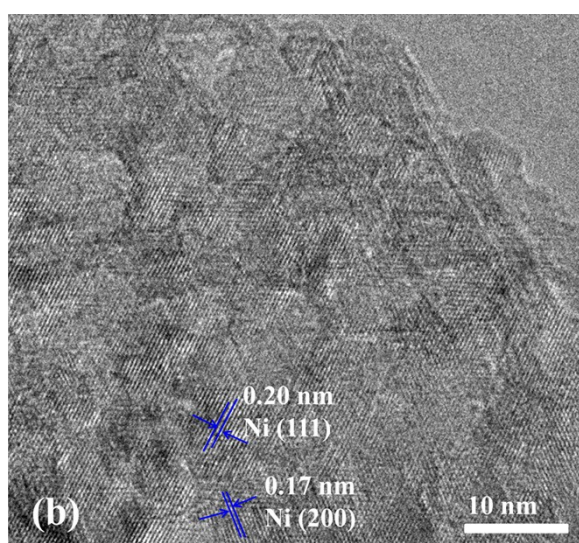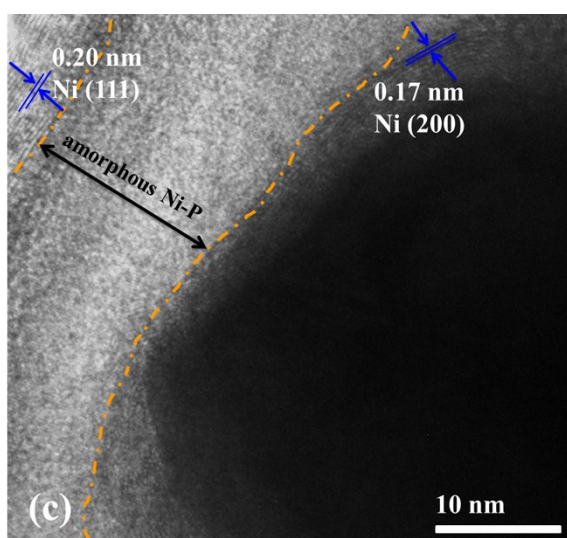

**Fig. S6** (a) TEM and (b, c) HRTEM images of the the Ni-P/p-Ni.

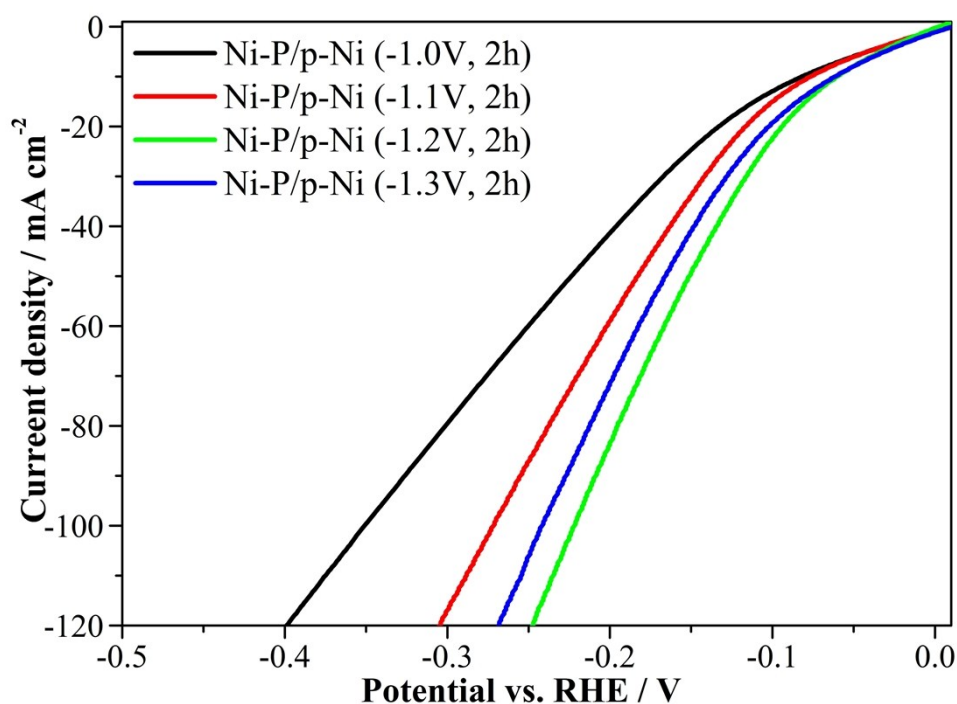

**Fig. S7** Linear sweep voltammetry curves of the Ni-P/p-Ni synthesized at different potentials of electrochemical-phosphorization for 3 h.

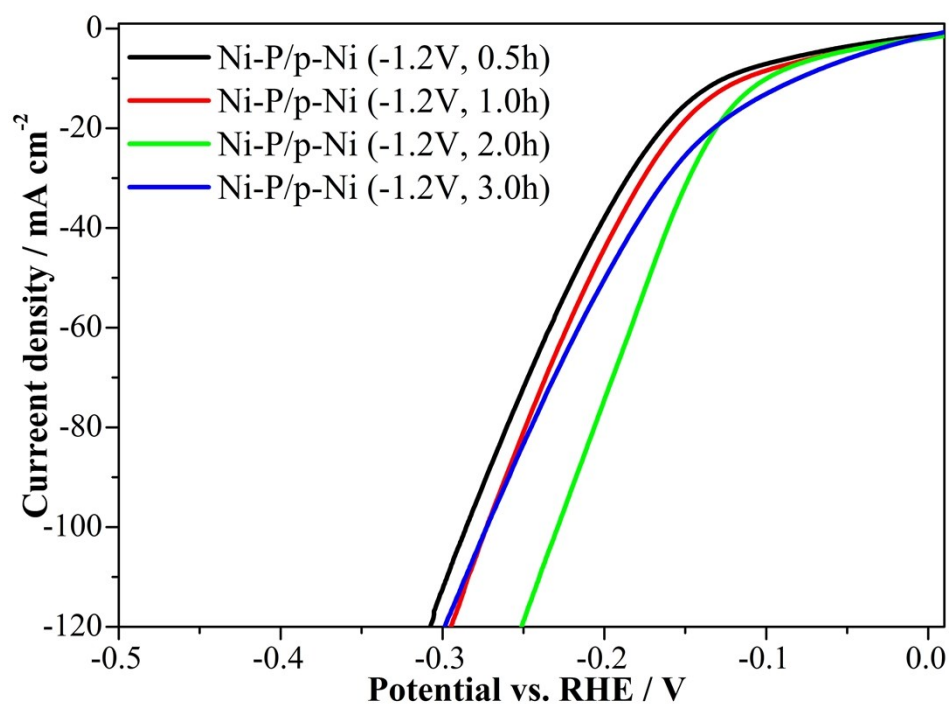

**Fig. S8 (a)** Linear sweep voltammetry curves of the Ni-P/p-Ni synthesized at different duration of electrochemical-phosphorization.



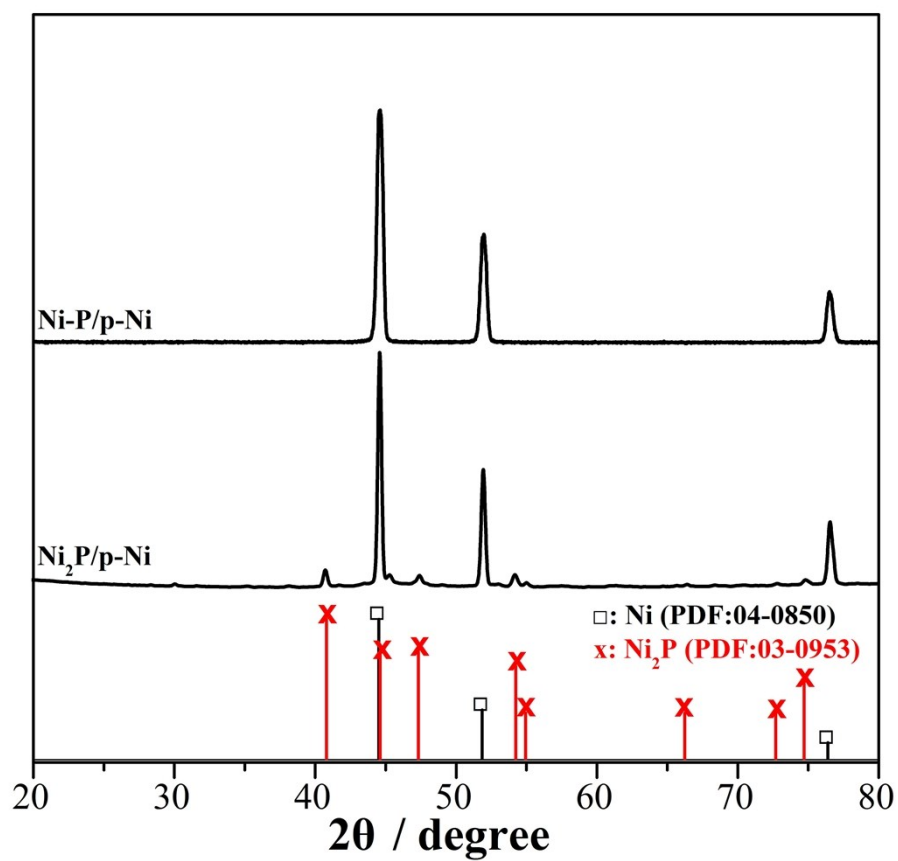

**Fig. S9** XRD pattern of the Ni-P/p-Ni and Ni<sub>2</sub>P/p-Ni.

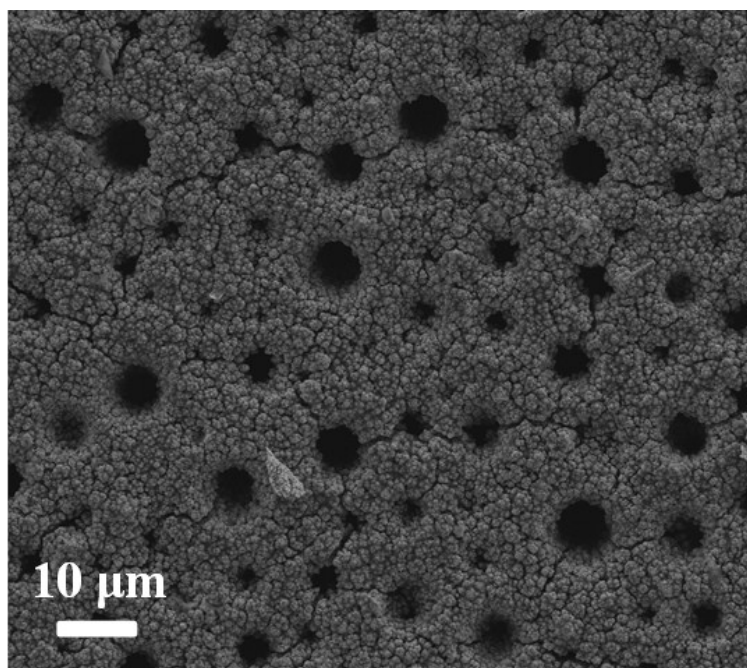

**Fig. S10** SEM image of the Ni-P/p-Ni after HER stability test.

**Table S1.** HER performances of the Ni-P/p-Ni and other reported electrocatalysts in 1.0 M KOH. (j: current density;  $\eta$ : overpotential).

| Catalysts                                  | $\eta_{10}$<br>(j=10 mA cm <sup>-2</sup> ) | Tafel slope<br>(mV dec <sup>-1</sup> ) | References                                      |
|--------------------------------------------|--------------------------------------------|----------------------------------------|-------------------------------------------------|
| Ni-P/p-Ni                                  | 69                                         | 76                                     | This work                                       |
| NiP <sub>2</sub> /NiO nanorod              | 131                                        | 94                                     | ACS Appl. Mater. Interfaces,<br>2018, 10, 17896 |
| Fe <sub>0.5</sub> Co <sub>0.5</sub> P      | 143                                        | 94                                     | ACS Catal., 2019, 9, 2956                       |
| Ni-Co-P/NF                                 | 156                                        | 108.4                                  | J. Mater. Chem. A, 2018, 6,<br>12506            |
| CoP/NPC/TF                                 | 80                                         | 50                                     | Adv. Energy Mater., 2019, 9,<br>1803970         |
| Co <sub>2</sub> P/CoN-in-<br>NCNTs         | 98                                         | 57                                     | Adv. Funct. Mater., 2018, 28,<br>1805641        |
| Co/CoP-5                                   | 193                                        | 73.8                                   | Adv. Energy Mater. 2017, 7,<br>1602355          |
| CoP-N/Co foam                              | 60                                         | 50.9                                   | J. Mater. Chem. A, 2019, 7,<br>13242            |
| CoNiP@NF                                   | 155                                        | 115                                    | J. Mater. Chem. A, 2016, 4,<br>10195            |
| CoMoP@C                                    | 133                                        | 92                                     | Energy Environ. Sci., 2017, 10,<br>788          |
| Ni <sub>0.51</sub> Co <sub>0.49</sub> P-NF | 82                                         | 43                                     | Adv. Funct. Mater., 2016, 26,<br>7644           |
| Ni <sub>1.5</sub> Fe <sub>0.5</sub> P/CF   | 158                                        | 125                                    | Nano Energy, 2017, 34, 472                      |
